# Supplementary material
Source: publisher figshare collection journal article supplement (https://acs.figshare.com/ndownloader/files/12970265)
Supplement: Supplementary file 1 [file 12970265]

## Supporting information

### **Sulfobetaines meet carboxybetaines: Modulation of thermo- and ion responsivity, water structure, mechanical properties and cell adhesion.**

*Martin Danko<sup>1,2</sup>, Zuzana Kroneková<sup>2</sup>, Miroslav Mrlik<sup>3</sup>, Josef Osicka<sup>1</sup>, Ammar bin Yousaf<sup>1</sup>, Andrea*

*Mihálová<sup>2</sup>, Jan Tkáč<sup>4</sup>, Peter Kasak<sup>1,\*</sup>*

<sup>1</sup> Center for Advanced Materials, Qatar University, P.O.Box 2713, Doha, Qatar; e-mail: [peter.kasak@qu.edu.qa](mailto:peter.kasak@qu.edu.qa)

<sup>2</sup> Polymer Institute, Slovak Academy of Sciences, Dúbravská cesta 9, 845 41 Bratislava, Slovak Republic

<sup>3</sup>Centre of Polymer Systems, University Institute, Tomas Bata University in Zlin, Trida T, Bati 5678, 760 01, Zlin, Czech Republic.

<sup>4</sup> Department of Glycobiotechnology, Institute of Chemistry, Slovak Academy of Sciences, Dúbravská cesta 9, 845 38 Bratislava, Slovak Republic

Content:

**Figure S1:** Swelling equilibrium after preparation of hydrogels

**Figure S2:** Transparency measurements of zwitterion hydrogels. The thickness of the gels was 1 mm at 20 °C.

**Figure S3:** Images of different hydrogels with different shape at 37 °C (upper row), 20°C (middle row) and 2°C (down row).

**Figure S4:** Repeatability of normalised swelling equilibrium of hydrogels immersed in 3.5 wt% NaCl and DI solution . Hydrogels were kept in pure water (pH~ 7.3) for 24 hours after preparation and prior to swelling experiment in NaCl solution

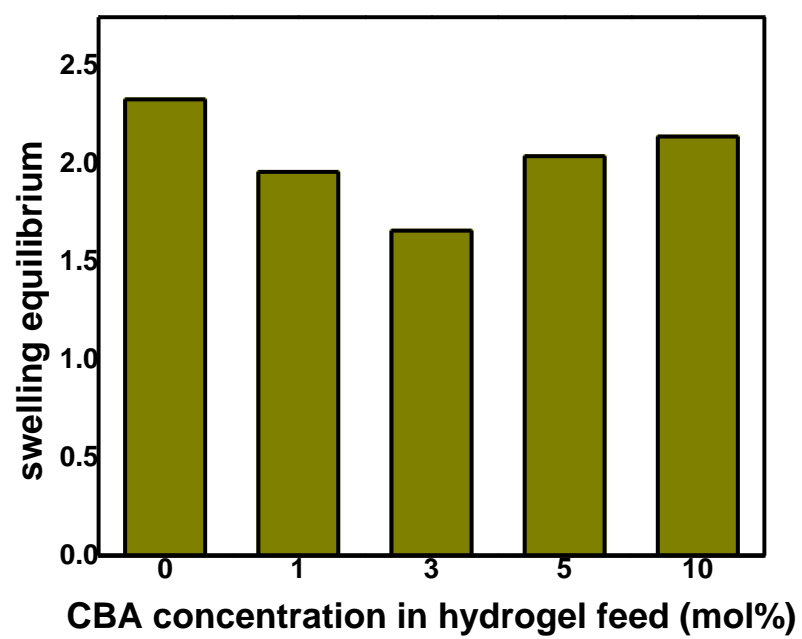

**Figure S1:** Swelling equilibrium after preparation of hydrogels

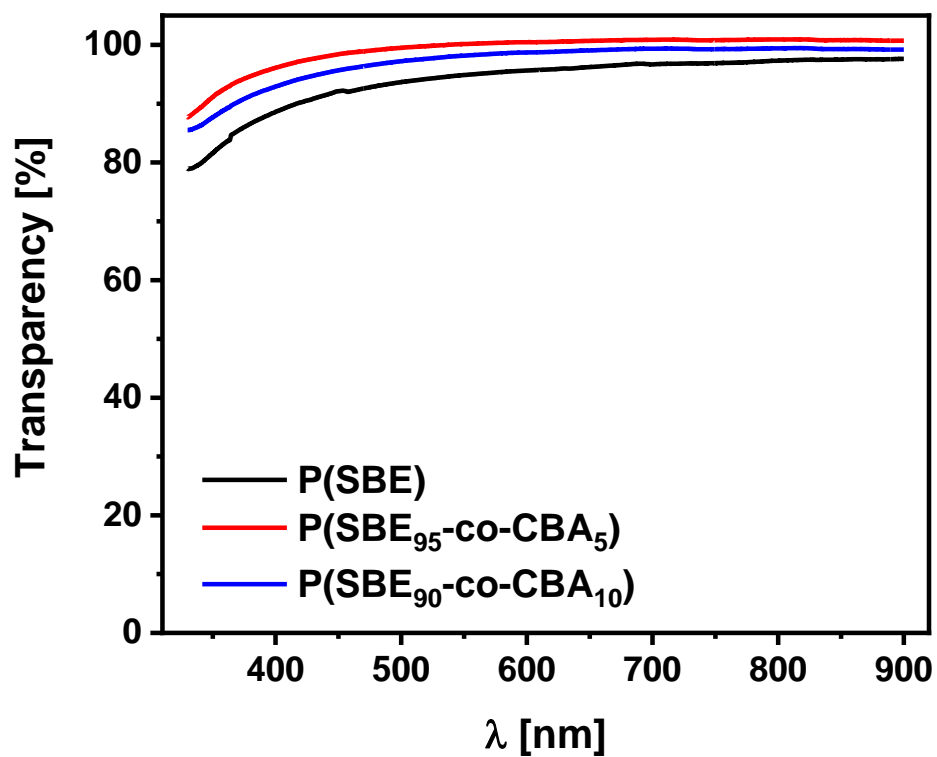

**Figure S2:** Transparency measurements of zwitterion hydrogels. The thickness of the gels was 1 mm at 20 °C.

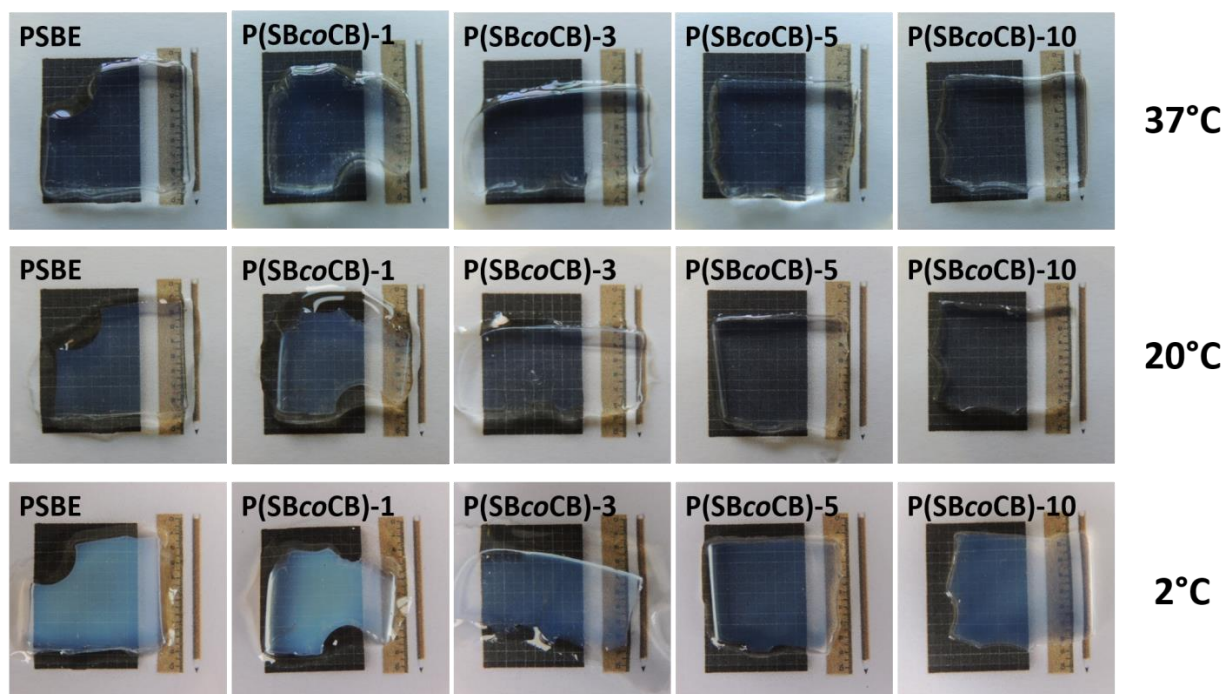

**Figure S3:** Images of different hydrogels with different shape at 37 °C (upper row), 20°C (middle row) and 2°C (down row).

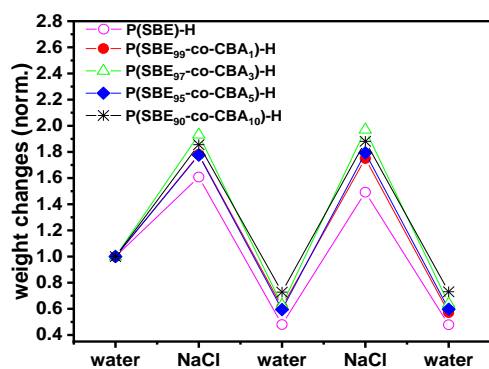

**Figure S4:** Repeatability of normalised swelling equilibrium of hydrogels immersed in 3.5 wt% NaCl and DI solution . Hydrogels were kept in pure water (pH~ 7.3) for 24 hours after preparation and prior to swelling experiment in NaCl solution.
